# Supplementary material for: Epstein–Barr Virus Gene BARF1 Expression is Regulated by the Epithelial Differentiation Factor ΔNp63α in Undifferentiated Nasopharyngeal Carcinoma
Source: PubMed Central journal article supplement (PMC5876651; doi:10.3390/cancers10030076), 2018-03-17

# Supplementary Materials: Epstein-Barr virus gene BRF1 expression is regulated by the epithelial differentiation factor $\Delta$ Np63 $\alpha$ in undifferentiated nasopharyngeal carcinoma.

Eveline Hoebe, Coral Wille, Stacy Hagemeyer, Shannon Kenney, Astrid Greijer and Jaap Middeldorp

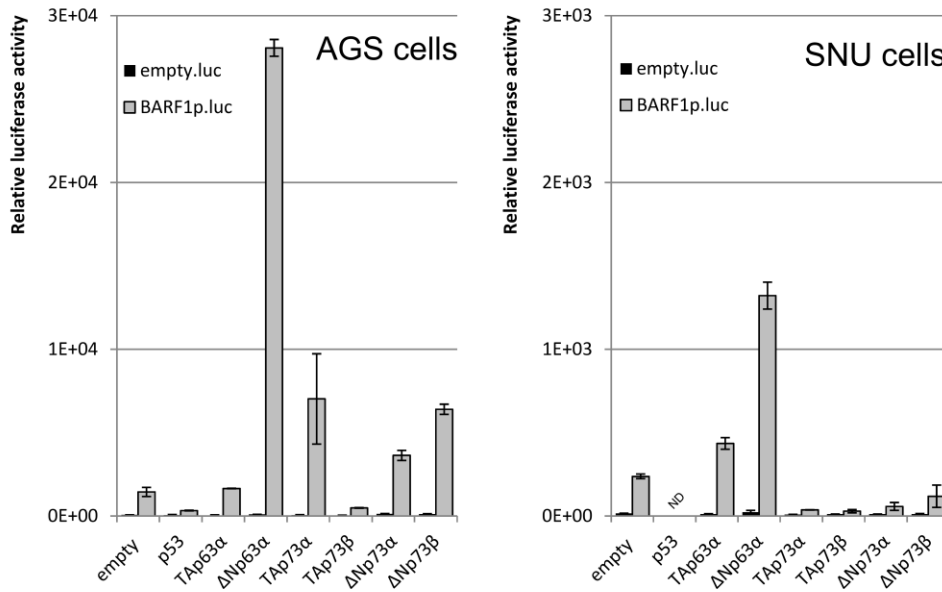

Figure S1. 1- $\Delta$ Np63 $\alpha$ \_transactivates\_BRF1-Hoebe-2013

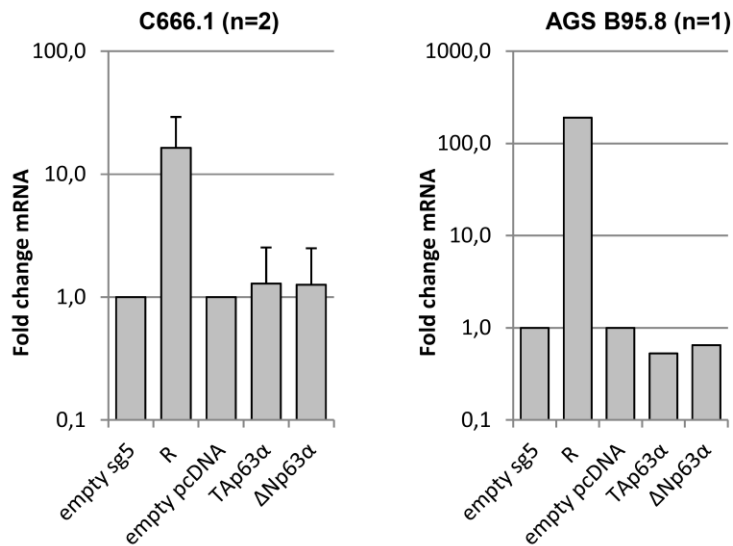

Figure S2. 2- $\Delta$ Np63 $\alpha$ \_transactivates\_BRF1-Hoebe-2013

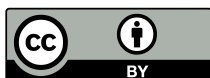

Supplement: cancers-10-00076-s001.pdf [file cancers-10-00076-s001.pdf]
